# Supplementary material for: Graphene oxide and its nanocomposites with EDTA or chitosan induce apoptosis in MCF-7 human breast cancer
Source: Royal Society of Chemistry journal article supplement (doi:10.1039/d1ra04345e), 2021-01-01

|                      |                                       |                                                                                   |
|----------------------|---------------------------------------|-----------------------------------------------------------------------------------|
| <b>Researcher</b>    | : Dr.Ahmed Soliman                    | email: <a href="mailto:ahmed_doghish@azhar.edu.eg">ahmed_doghish@azhar.edu.eg</a> |
| <b>Assay</b>         | : Cell Cycle Analysis                 |                                                                                   |
| <b>Samples</b>       | : 05 *3 samples                       |                                                                                   |
| <b>cell line</b>     | : ---                                 |                                                                                   |
| <b>Ref.</b>          | : ---                                 |                                                                                   |
| <b>Date</b>          | : 23-09-2020                          |                                                                                   |
| <b>Reader</b>        | : BD FACSCalibur                      |                                                                                   |
| <b>Kit used</b>      | : Propidium Iodide Flow Cytometry Kit |                                                                                   |
| <b>Solvent</b>       | :                                     |                                                                                   |
| <b>Assay samples</b> | : Cell culture                        |                                                                                   |

## Lab Report

| ser | Sample data  | Results     |       |       |       |       |       |       |       |       |         |       |       |
|-----|--------------|-------------|-------|-------|-------|-------|-------|-------|-------|-------|---------|-------|-------|
|     |              | DNA content |       |       |       |       |       |       |       |       |         |       |       |
|     | code         | %G0-G1      |       |       | %S    |       |       | %G2/M |       |       | %Pre-G1 |       |       |
| 1   | Cont. MCF7   | 57.40       | 49.10 | 55.25 | 42.39 | 37.26 | 36.80 | 7.60  | 6.51  | 7.68  | 1.91    | 1.66  | 1.78  |
| 2   | Taxol/MCF7   | 38.76       | 31.77 | 34.80 | 29.47 | 26.49 | 24.67 | 41.77 | 38.8  | 33.47 | 37.10   | 32.85 | 30.77 |
| 3   | GO/MCF7      | 54.53       | 47.00 | 46.69 | 34.44 | 33.00 | 29.96 | 19.70 | 18.57 | 16.10 | 19.87   | 20.63 | 17.27 |
| 4   | GO-EDTA/MCF7 | 36.97       | 31.05 | 33.20 | 26.70 | 23.38 | 22.48 | 45.57 | 41.66 | 38.99 | 41.19   | 44.94 | 38.15 |
| 5   | GO-CS/MCF7   | 48.74       | 46.10 | 44.11 | 36.93 | 31.08 | 29.53 | 23.42 | 21.09 | 19.00 | 26.00   | 32.44 | 28.90 |

|         | %G0/G1 |       | %S    |      | %G2/M |      | %Pre-G1 |      |
|---------|--------|-------|-------|------|-------|------|---------|------|
|         | Mean   | SD    | Mean  | SD   | Mean  | SD   | Mean    | SD   |
| control | 53.92  | 4.31  | 38.82 | 3.1  | 7.26  | 0.65 | 1.79    | 0.13 |
| Taxol   | 35.11  | 3.51  | 26.88 | 2.42 | 38.01 | 4.21 | 33.57   | 3.22 |
| GO      | 49.41  | 4.44  | 32.47 | 2.28 | 18.12 | 1.84 | 19.26   | 1.76 |
| GO-EDTA | 33.74  | 2.99  | 24.19 | 2.23 | 42.07 | 3.31 | 41.43   | 3.4  |
| GO-CS   | 46.32  | 2.316 | 32.51 | 3.9  | 21.17 | 2.21 | 29.11   | 3.2  |

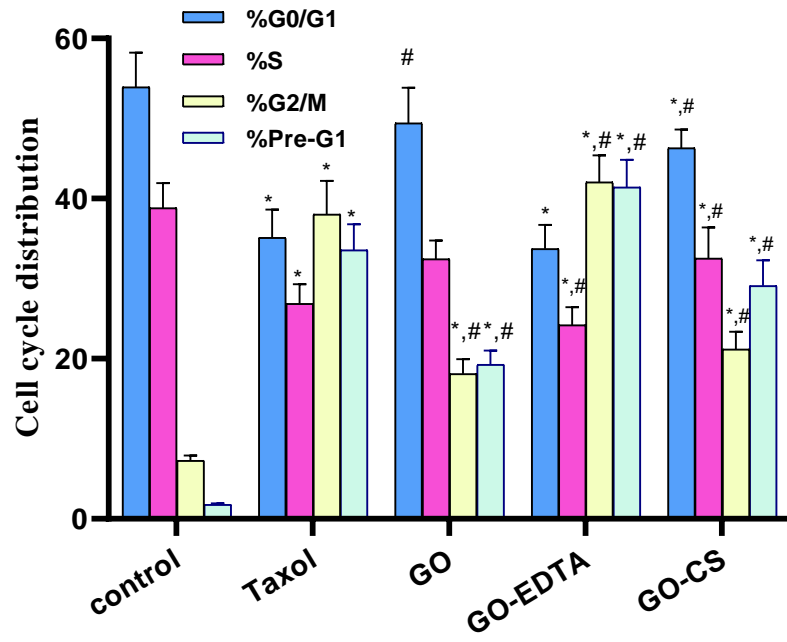

Supplement: d1ra04345e1.pdf [file d1ra04345e1.pdf]
